# Supplementary material
Source: PubMed Central journal article supplement (PMC3411914)
Supplement: NIHMS380354-supplement-1.pdf [file NIHMS380354-supplement-1.pdf]

## **Supplemental materials for:**

### **Activation of lateral habenula inputs to the ventral midbrain promotes behavioral avoidance**

Alice M. Stamatakis<sup>1</sup> & Garret D. Stuber<sup>1,2\*</sup>

<sup>1</sup>UNC Neurobiology Curriculum

<sup>2</sup>Departments of Psychiatry & Cellular and Molecular Physiology

UNC Neuroscience Center

University of North Carolina at Chapel Hill

Chapel Hill, NC 27599

\*Address correspondence to:

Garret D. Stuber, Ph.D.

Assistant Professor

Departments of Psychiatry & Cell and Molecular Physiology

UNC Neuroscience Center

University of North Carolina at Chapel Hill

Tel: +1 (919) 843-7140

Fax: +1 (919) 966-1050

Email: [gstuber@med.unc.edu](mailto:gstuber@med.unc.edu)

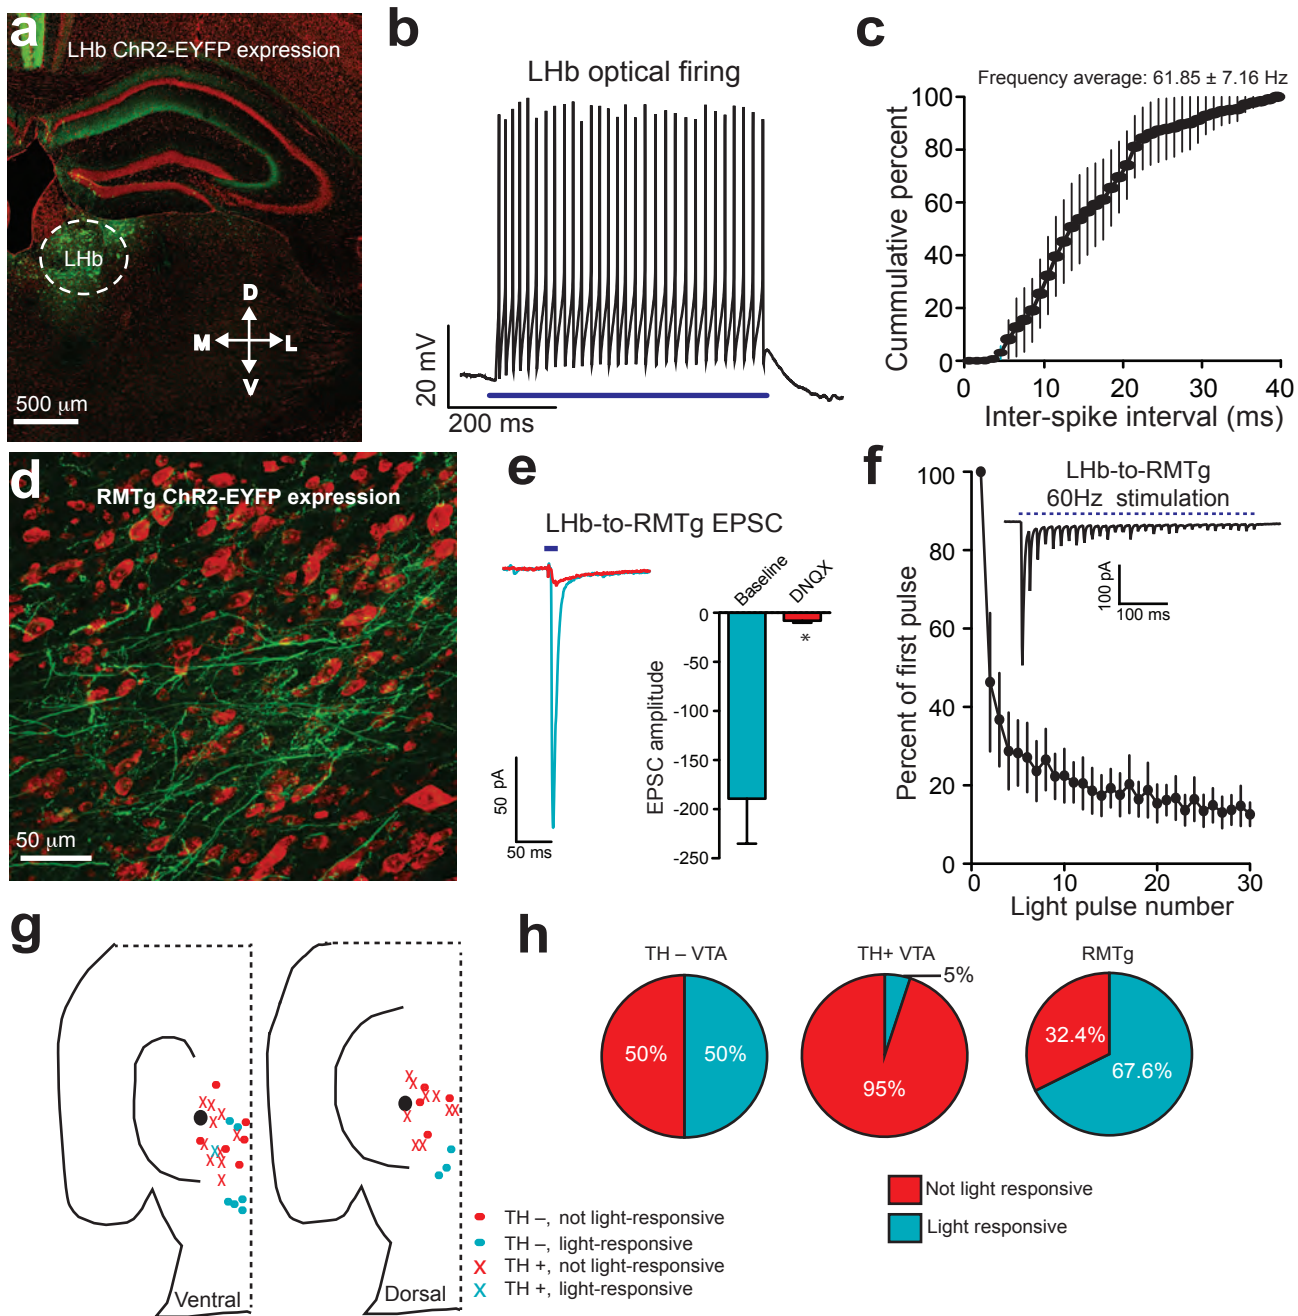

**Supplementary Figure 1:** Optogenetic stimulation of LHB terminals in the midbrain. **(a)** Expression of ChR2-EYFP (green) following injection of the viral construct into the LHB. Neurons were counter-stained using a red fluorescent Nissl stain. D, Dorsal; V, Ventral; M, Medial; L, Lateral. **(b,c)** Activation of ChR2 expressed in LHB cell bodies in brain slices resulted in sustained high frequency activation during the 500 ms stimulation ( $n = 7$  cells). **(d)** Confocal compressed z-stack showing that ChR2-EYFP is expressed in LHB projection fibers in the RMTg after virus injection into the LHB. **(e)** Postsynaptic optically-evoked EPSCs recorded from RMTg neurons were significantly attenuated following bath application of 10 mM DNQX ( $t(6) = 3.94$ ,  $p = 0.07$ ,  $n = 4$  cells). **(f)** LHB efferents to the RMTg were stimulated at 60 Hz for all behavioral tasks. Optically-evoked EPSCs at this frequency for 500 ms show a significant reduction in amplitude across the pulse train stimulation ( $F_{2,29} = 60.21$ ,  $p < 0.001$ ,  $n = 5$  cells) **(g)** Location of TH+ and TH- light-responsive and non-light-responsive neurons in horizontal midbrain brain slices. **(h)** Percentage of light-responsive TH+ midbrain neurons, TH- midbrain neurons, and RMTg neurons. 5% (1/20) of TH+ neurons in the VTA were light responsive. 50% (10/20) of VTA TH- neurons were light responsive. 67.6% (75/111) of RMTg neurons were light responsive in a sagittal slice preparation.

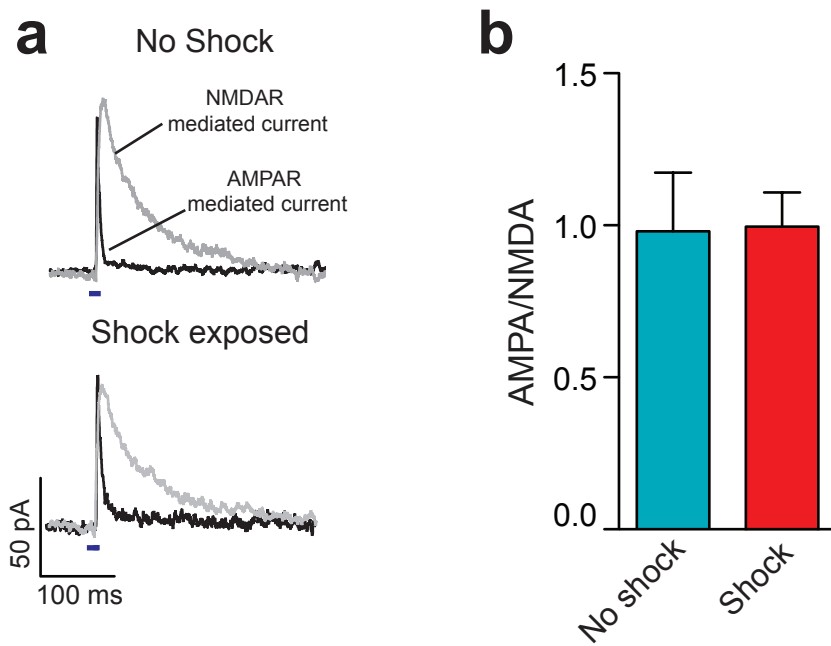

**Supplementary Figure 2:** Acute unpredictable shock does not alter AMPA/NMDA ratio (a) Representative optically evoked AMPA/NMDA ratios at Lhb-to-RMTg synapses following 0 or 19 foot shocks. (b) Optically evoked AMPA/NMDA ratios were not significantly different between the groups ( $t(14) = 0.36$ ,  $p = 0.86$ ).  $n = 8$  cells/group.

**a**

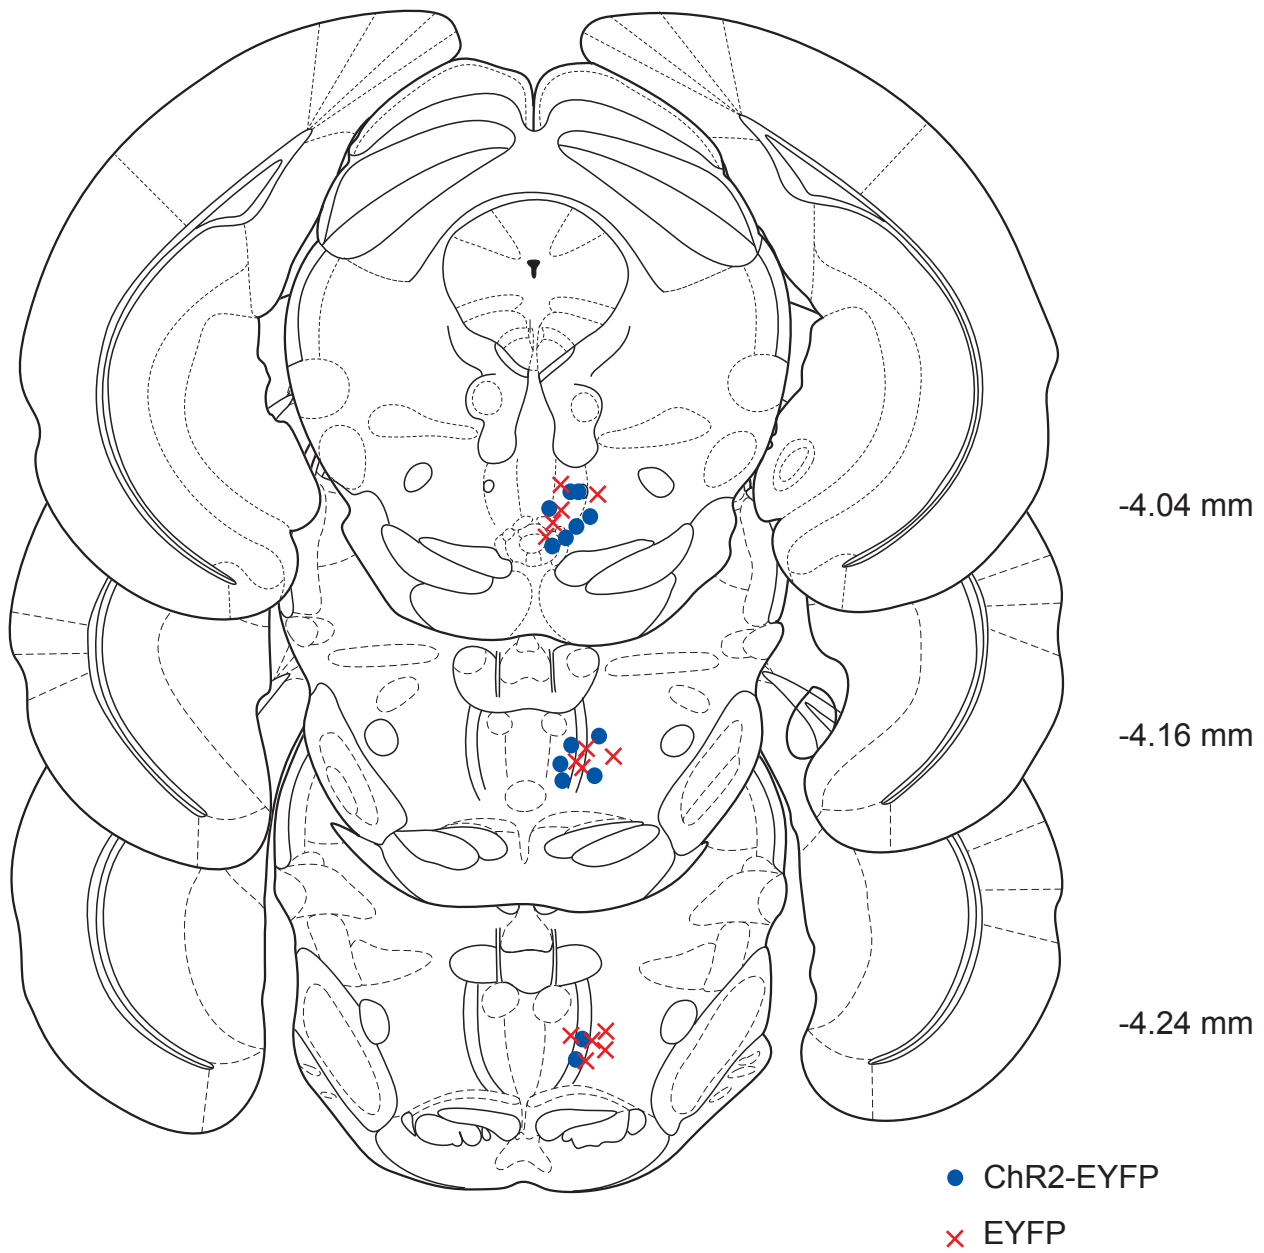

**Supplementary Figure 3:** Optical fiber placements (a) Lhb-to-RMTg optical stimulation sites for behavioral experiments. Symbols represent where the fiber tract terminated.



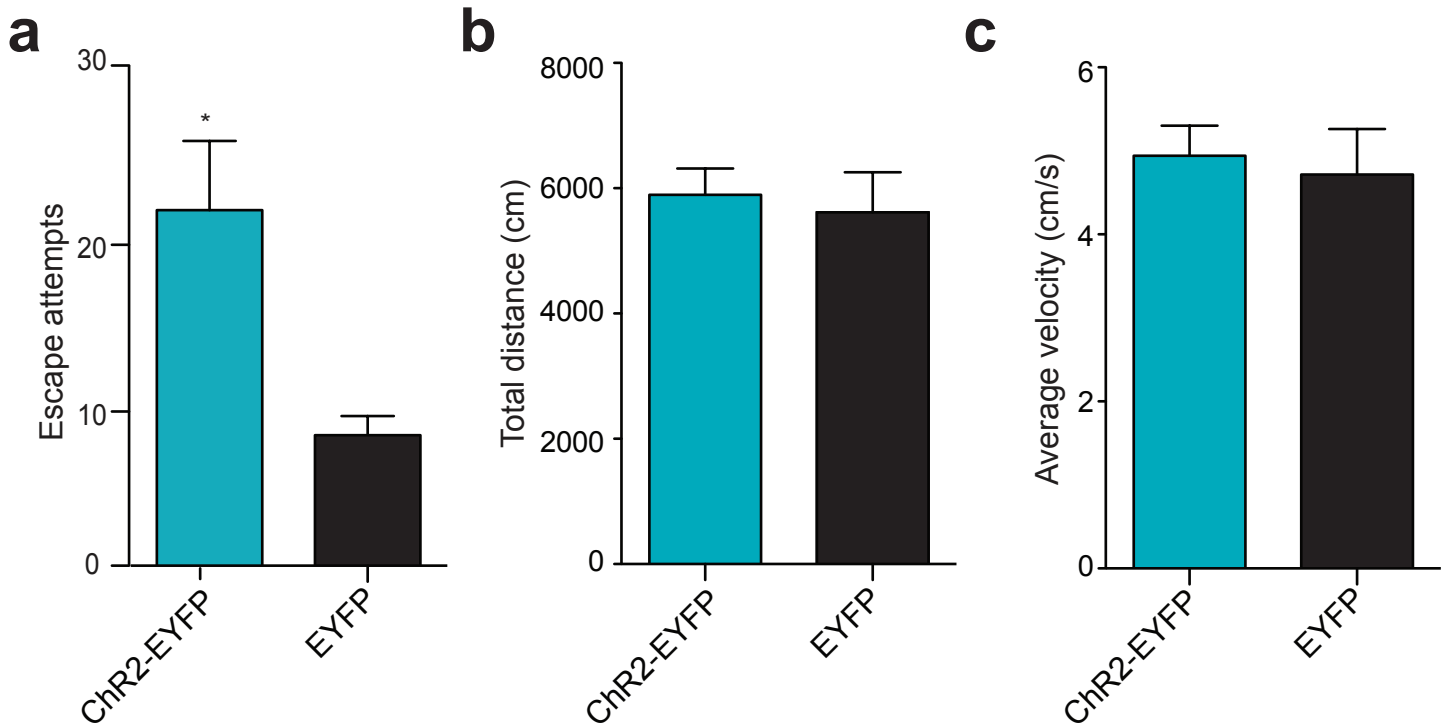

**Supplementary Figure 4:** Real-time place preference (a) ChR2-EYFP-expressing mice made significantly more escape attempts during the real-time place preference session than EYFP-expressing mice ( $t(10) = 2.82$ ,  $p = 0.018$ ) (b) Total distance (cm) during the real time place preference experiment across the entire arena was not significantly different between groups ( $t(10) = 0.37$ ,  $p = 0.72$ ) (c) Average velocity across the entire 20-min session across the entire arena was not significantly different between groups ( $t(10) = 0.34$ ,  $p = 0.74$ ).  $n = 6$  mice per group.

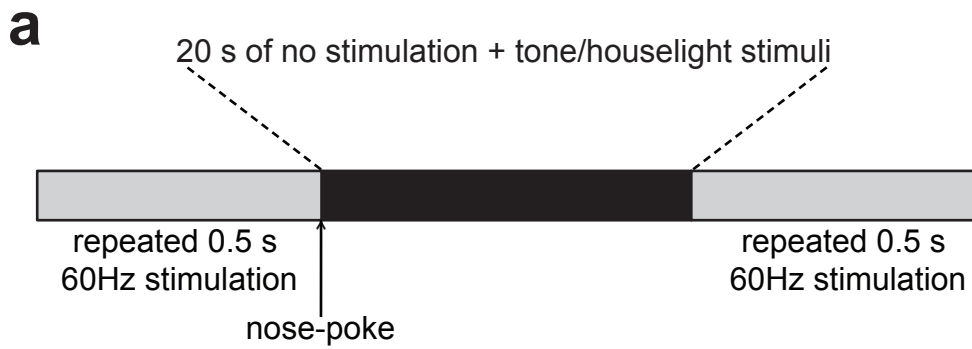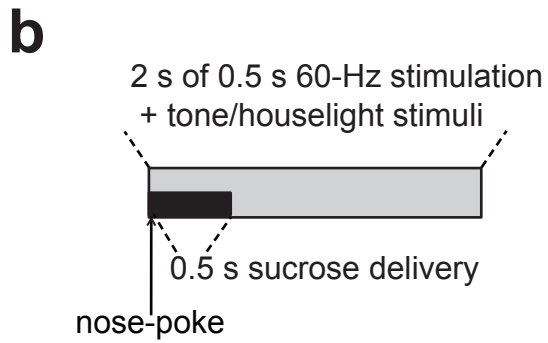

**Supplementary Figure 5:** Schematic of negative and positive reinforcement tasks. **(a)** Behavioral schematic for the 1-hr negative reinforcement session. **(b)** Behavioral schematic for the 1-hr positive reinforcement session.

**a**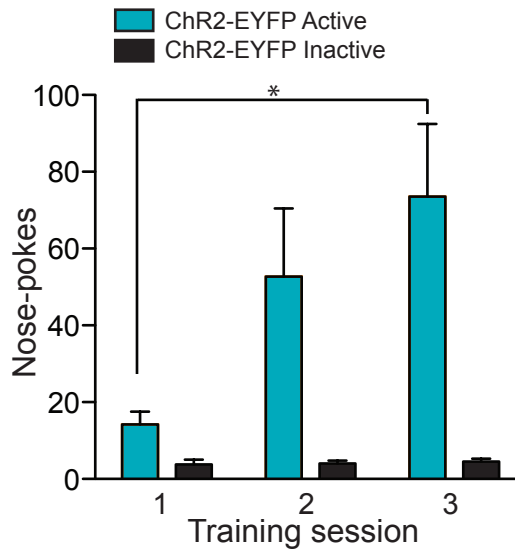**b**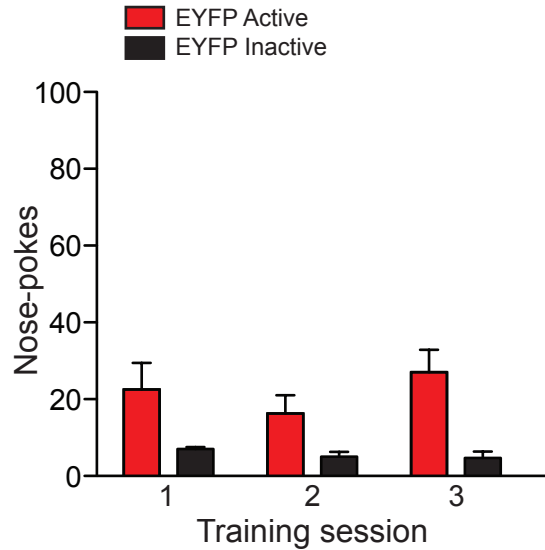

**Supplementary Figure 6:** Acquisition of nose-poking behavior in negative reinforcement task. **(a)** Active and inactive nose-poke responses from ChR2-EYFP-expressing mice over the first 3 days of training. There was a significant interaction between active lever presses and days ( $F_{2,10} = 3.86$ ,  $p = 0.03$ ). **(b)** Active and inactive nose-poke responses from EYFP-expressing mice over the first 3 days of training. There was no significant interaction between active lever presses and days ( $F_{2,10} = 0.84$ ,  $p = 0.44$ ).  $n = 6$  mice/group.

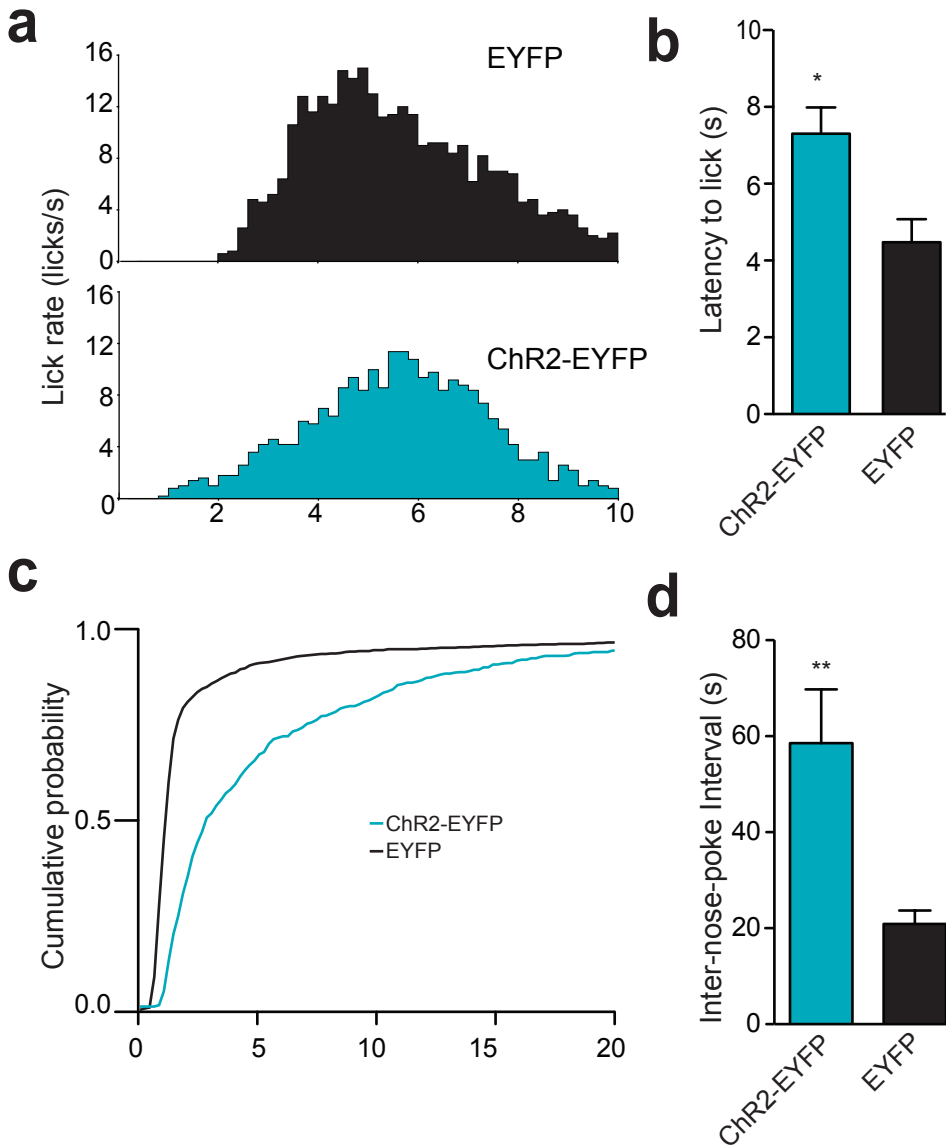

**Supplementary Figure 7:** Activation of LHb inputs to the RMTg decreases nose-pokes for sucrose and increases latency to lick during a positive reinforcement task **(a)** Example histograms of licks time-locked to active nose-poke for EYFP-expressing mouse (top) and ChR2-EYFP-expressing mouse (bottom). **(b)** Average latency to lick following stimulation for ChR2-EYFP and EYFP-expressing mice ( $t(2032) = 2.5$ ,  $p = 0.01$ ). **(c)** Cumulative probability of the latency to lick following stimulation for ChR2-EYFP and EYFP-expressing mice. **(d)** The inter nose-poke interval (time between each nose-poke averaged across the session) was significantly higher in ChR2-EYFP-expressing mice ( $t(3577) = 10.8$ ,  $p < 0.001$ ).  $n = 8$  mice per group.

## **Supplemental video captions**

**Video S1: LHb-to-RMTg activation during real-time place preference.** Video shows a representative ChR2-EYFP and EYFP-expressing mouse during the real-time place preference session.

**Video S2: LHb-to-RMTg activation during positive reinforcement.** Video shows a representative ChR2-EYFP and EYFP-expressing mouse during the positive reinforcement behavioral session, where each nose-poke is paired with a 60-Hz optical stimulation.
